1 **Metatranscriptomics as a tool to identify fungal species**  
2 **and subspecies in mixed communities**

3

4

5 Vanesa R. Marcelino<sup>1,2</sup>, Laszlo Irinyi<sup>1,2,3</sup>, John-Sebastian Eden<sup>1,2</sup>, Wieland Meyer<sup>1,2,3</sup>, Edward  
6 C. Holmes<sup>1,4</sup>, Tania C. Sorrell<sup>1,2</sup>

7

8

9 <sup>1</sup>Marie Bashir Institute for Infectious Diseases and Biosecurity and Faculty of Medicine and  
10 Health, Sydney Medical School, Westmead Clinical School, The University of Sydney,  
11 Sydney, NSW 2006, Australia.

12

13 <sup>2</sup>Molecular Mycology Research Laboratory, Centre for Infectious Diseases and  
14 Microbiology, Westmead Institute for Medical Research, Westmead, NSW 2145, Australia.

15

16 <sup>3</sup>Westmead Hospital (Research and Education Network), Westmead, NSW 2145, Australia.

17

18 <sup>4</sup>School of Life & Environmental Sciences, Charles Perkins Centre, The University of  
19 Sydney, Sydney, NSW 2006, Australia.

20

## 21 **Abstract**

22 High-throughput sequencing (HTS) enables the generation of large amounts of genome  
23 sequence data at a reasonable cost. Organisms in mixed microbial communities can now  
24 be sequenced and identified in a culture-independent way, usually using amplicon  
25 sequencing of a DNA barcode. Bulk RNA-seq (metatranscriptomics) has several  
26 advantages over DNA-based amplicon sequencing: it is less susceptible to amplification  
27 biases, it captures only living organisms, and it enables a larger set of genes to be used for  
28 taxonomic identification. Using a defined mock community comprised of 17 fungal isolates,  
29 we evaluated whether metatranscriptomics can accurately identify fungal species and  
30 subspecies in mixed communities. Overall, 72.9% of the RNA transcripts were classified,  
31 from which the vast majority (99.5%) were correctly identified at the species-level. Of the 15  
32 species sequenced, 13 were retrieved and identified correctly. We also detected strain-level  
33 variation within the *Cryptococcus* species complexes: 99.3% of transcripts assigned to  
34 *Cryptococcus* were classified as one of the four strains used in the mock community.  
35 Laboratory contaminants and/or misclassifications were diverse but represented only  
36 0.44% of the transcripts. Hence, these results show that it is possible to obtain accurate  
37 species- and strain-level fungal identification from metatranscriptome data as long as taxa  
38 identified at low abundance are discarded to avoid false-positives derived from  
39 contamination or misclassifications. This study therefore establishes a base-line for the  
40 application of metatranscriptomics in clinical mycology and ecological studies.

## 41 Introduction

42 Microscopic fungal species, such as yeasts and some filamentous fungi, do not live in  
43 isolation, they are most commonly found within mixed microbial communities inhabiting  
44 soil, water systems, plants and animal hosts. Assessing the diversity of fungi in mixed  
45 communities is important because different fungal taxa may exhibit distinctive phenotypes,  
46 and consequently may have different pathogenicity or functional roles. For example, in the  
47 rhizosphere, changes in fungal community composition have been associated with shifts in  
48 nutrient cycling (Hannula *et al.* 2017). Humans also harbor, or are exposed to, a diverse  
49 fungal community that provides a source of opportunistic pathogens (Bandara *et al.* 2019;  
50 Huffnagle & Noverr 2013; Seed 2014). Although it is typically assumed that invasive fungal  
51 infections are caused by a single strain, multiple *Candida* strains have been observed  
52 during the course of a single episode of infection (Soll *et al.* 1988). Furthermore, nearly 20%  
53 of patients with cryptococcosis are infected with multiple strains, with different phenotypes  
54 and virulence traits (Desnos-Ollivier *et al.* 2015; Desnos-Ollivier *et al.* 2010). Strain-level  
55 fungal diversity may influence therapeutic responsiveness and needs further investigation.

56 Despite its importance, fungal taxonomic diversity is poorly characterized. From  
57 over two million fungal species estimated to exist, less than 8% have been described  
58 (Hawksworth & Lucking 2017). Even well-known fungal species are often overlooked during  
59 routine diagnostic procedures, surveillance and biodiversity surveys (Brown *et al.* 2012;  
60 Enaud *et al.* 2018; Yahr *et al.* 2016). This is in part due to challenges in the detection and  
61 classification of these organisms, especially microscopic and cryptic species, for example,  
62 the etiologic agents of cryptococcosis. Currently, two species complexes are recognized:  
63 *Cryptococcus neoformans* and *Cryptococcus gattii* (Kwon-Chung *et al.* 2002). Seven major  
64 haploid lineages are found within these two species complexes (*C. neoformans* species  
65 complex: VNI, VNII, VNIV, and *C. gattii* species complex: VGI, VGII, VGIII and VGIV) and  
66 their recognition as distinct biological species has been debated (Hagen *et al.* 2015; Kwon-  
67 Chung *et al.* 2017; Ngamskulrungraj *et al.* 2009). Being able to distinguish closely-related  
68 lineages is important because their phenotype, virulence and ecophysiology can vary  
69 substantially. For example, the JEC21 and B-3501 strains of *C. neoformans* var.  
70 *neoformans* (VNIV) are 99.5% identical at the genomic sequence level but differ  
71 substantially in thermotolerance and virulence (Loftus *et al.* 2005). Likewise, different  
72 virulence and antifungal tolerance traits were observed within lineages of *C. gattii* VGIII  
73 (Firacative *et al.* 2016).

74 The introduction of high-throughput sequencing (HTS) marked a new era in  
75 mycological research, where the vast diversity of fungi can be studied without the need for

76 culture (Nilsson *et al.* 2019). To date, amplicon sequencing of marker genes  
77 (metabarcoding) has been the most popular HTS method used to identify fungal species in  
78 mixed communities. Despite its indisputable utility, metabarcoding surveys are affected by  
79 PCR amplification biases, and even abundant species can go undetected due to primer  
80 mismatch (Marcelino & Verbruggen 2016; Nilsson *et al.* 2019; Tedersoo *et al.* 2015). In  
81 addition, DNA fragments from dead organisms inflate biodiversity estimates in  
82 metabarcoding surveys (Carini *et al.* 2016). Stool samples, for instance, naturally contain  
83 food-derived DNA, which cannot be distinguished from the genetic material of the resident  
84 gut microbiota when using DNA-based methods. These challenges can be circumvented by  
85 directly sequencing actively transcribed genes, via RNA-Seq, hence avoiding the  
86 amplification step, and obtaining an unbiased characterization of the living microbial  
87 community. Metatranscriptomics has been used to identify RNA viruses in a range of  
88 animal samples (Shi *et al.* 2016; Shi *et al.* 2017; Wille *et al.* 2018; Zhang *et al.* 2018) and to  
89 characterize the functional profile of microbial communities (Bashiardes *et al.* 2016; Kuske  
90 *et al.* 2015). Studies applying metatranscriptomics to mycorrhizal communities have  
91 provided valuable insights into the functional roles of fungi in these symbiotic systems  
92 (Gonzalez *et al.* 2018; Liao *et al.* 2014). However, links between functional and species-level  
93 taxonomy have been sought infrequently, likely because fungal identification from  
94 metatranscriptome data is considered unreliable below phylum level (Nilsson *et al.* 2019).  
95 Critically, it is currently unknown whether metatranscriptomics can accurately identify fungi  
96 at the species and subspecies level within a mixed community. This information is  
97 fundamental to the investigation of the potential and utility of metatranscriptomics in  
98 diagnostics and ecological studies.

99         Herein, we evaluated the utility of metatranscriptomics as a tool for the  
100 simultaneous identification of fungal species, using a defined mock community containing  
101 15 fungal species. In addition, we investigated whether strains belonging to sister species,  
102 such as the *C. neoformans* and *C. gattii* species complexes could be identified correctly  
103 using metatranscriptomics. Rather than focusing on marker genes, we sought to classify  
104 fungal species using the information from all expressed genes, using the totality of NCBI's  
105 nucleotide collection as a reference database. This study paves the way to apply state-of-  
106 the art techniques in fungal biodiversity surveys and clinical diagnostics.

107

## 108 **Methods**

109 A defined fungal community was constructed from 17 isolates, including 15 fungal species  
110 and three strains of the *C. neoformans* species complex in addition to one strain of *C. gattii*

111 (Table 1). Fungal strains were obtained from the Westmead Mycology Culture Collection  
112 and cultured on Sabouraud agar at 27°C for 72 hours. A sweep of colonies was made with  
113 a disposable inoculating loop and dispersed in PBS. Fungal cells were quantified in a  
114 Neubauer chamber and their concentration adjusted such that the fungal mixture contained  
115 equal concentrations of each species ( $10^8$  cells/mL). RNA was isolated with the RNeasy  
116 Plus kit (Qiagen), following the manufacture's protocol, with an initial freeze-thaw step in  
117 liquid nitrogen to disrupt fungal cells. The quantity and quality of the RNA extract was  
118 determined with the Nanodrop Spectrophotometer (Thermo Scientific) and the Agilent 2200  
119 TapeStation. As some residual DNA was detected, the RNA extract was further treated with  
120 DNase I (Qiagen). Ribosomal depletion (Ribo-Zero Gold technology), library preparation and  
121 sequencing (Illumina HiSeq HT, 125bp Paired End) were performed by the Australian  
122 Genomics Research Facility. The raw sequence data were deposited in the NCBI Short  
123 Read Archive (accession PRJNA521097).

124       Sequence reads containing more than five ambiguous positions or with average  
125 quality scores  $\leq 25$  were filtered from the dataset using prinseq-lite v.0.20.4 (Schmieder &  
126 Edwards 2011) with the options `-ns_max_n 5 -min_qual_mean 25 -out_format 3`. Assembly  
127 of sequence reads into contigs was performed with Trinity v.2.5.1 (Grabherr *et al.* 2011).  
128 Contigs were mapped to the NCBI nucleotide collection using KMA (Clausen *et al.* 2018), a  
129 novel approach that has proven to be more accurate than other mapping software. Prior to  
130 mapping, NCBI's taxonomic identifier codes (taxids) were appended to each sequence  
131 record in the nucleotide collection, and the reference database was indexed using KMA's  
132 options `-NI -Sparse TG`. Contigs were then mapped to the indexed database with the  
133 options `-mem_mode -and -apm f`. Matches to the reference database with low support (*i.e.*  
134 coverage  $< 20$  and depth  $< 0.05$ ) were excluded from the analyses. The species-level  
135 taxonomic classifications were based on NCBI's taxonomy identifiers (taxids) to minimize  
136 the issue of changing species nomenclature (Federhen 2012). Subspecies-level  
137 classifications within the *Cryptococcus neoformans* and *C. gattii* species complexes were  
138 examined manually.

139       Abundance was estimated at the level of sequence reads and transcripts. For read-  
140 level abundances, sequence reads were mapped to transcripts using Bowtie2 (Langmead &  
141 Salzberg 2012) and quantified in Transcripts Per Million (TPM) with RSEM (Li & Dewey  
142 2011), using the Trinity pipeline. For transcript-level abundances, the depth values  
143 estimated within KMA were used, which is the total number of nucleotides (in each contig)  
144 covering the reference sequence divided by the length of the reference sequence. The  
145 number and length of assembled contigs for each taxon is likely a better proxy for species

146 abundance than read-level abundances (which are subject to gene expression), and  
147 therefore were used for graphic representation and analyses. For simplicity, we refer as  
148 ‘abundance’ the transcript-level abundance, unless otherwise stated.

149 It would be logical to expect that species with larger and gene-rich genomes would  
150 express a greater number of transcripts. To test for this potential correlation, genome sizes  
151 and the estimated number of proteins were obtained from the Fungal Genome Size  
152 Database (Kullman *et al.* 2005), Loftus *et al.* (2005), Muñoz *et al.* (2018) and NCBI’s Genome  
153 database (Supplementary table S1). The correlation coefficients between genome size,  
154 number of proteins and abundance of transcripts were estimated using Person’s correlation  
155 and visualized using the R package *ggpubr* (Kassambara 2017).

156  
157

## 158 **Results**

159 RNA sequencing yielded a total of 26,558,491 paired end reads, of which 98.3% passed  
160 quality control. Overall, 277,404 contigs (transcripts) were obtained, from which 202,219  
161 (72.9%) were classified. The majority of the sequence reads (80.2%) mapped to a classified  
162 contig. Of the 15 fungal species sequenced, 13 were retrieved and correctly classified at  
163 the species level (Figure 1, Table 2, Supplementary table S2). The two false-negatives were  
164 *Debaryomyces hansenii* and *Schizosaccharomyces pombe*; these may have been  
165 misclassified as another fungus or were lost due to cell pooling inaccuracy and/or RNA  
166 extraction biases. A small proportion of bacterial transcripts (0.03%) and other eukaryotic  
167 microbes (0.4%, including 31 fungi that were not present in the mock community) was also  
168 observed (Table 2, Supplementary table S2), which likely represent laboratory contaminants  
169 and misclassifications (see discussion). However, these were present at a consistently  
170 lower frequency than true members of the mock community, with the most common –  
171 *Candida glycerinogenes* – only present in 0.08% of the transcripts. Some of the transcripts  
172 were assigned to entries in GenBank that do not have a species-level classification (*e.g.*  
173 *Candida sp.* and *Pichia sp.*). These assignments were considered misclassifications here,  
174 although it is possible that the species in our mock community are the correct species-level  
175 identity of these GenBank sequences.

176 Overall, the commonest species detected was *C. neoformans*, which was to be  
177 expected as it comprised three strains in the mock community and therefore was three  
178 times more abundant than other fungal species. Transcripts belonging to *Candida tropicalis*  
179 and *Pichia kudriavzevii* (former *Candida krusei*) – were also common (19.2% and 18.8%,  
180 respectively), while *C. albicans*, *C. orthopsilosis* and *C. glabrata* (other causes of

181 candidaemia in humans) were detected at lower abundance (2.0 – 2.9%). There was no  
182 relationship evident between abundance of transcripts and phylogenetic relatedness.  
183 Genomes with low GC content can be overrepresented in metagenomic sequencing  
184 (Shakya *et al.* 2013). Conversely, some of the species detected here in high abundance  
185 (*Cryptococcus neoformans* and *Clavispora lusitanae*) have a higher GC content than most  
186 other fungal species (Dujon 2010), suggesting that GC bias is unlikely to affect our results.  
187 No correlation between abundance of transcripts and genome size or estimated number of  
188 proteins was observed ( $p > 0.05$ , Supplementary figure 1).

189 Molecular type and strain-level variation within the *Cryptococcus neoformans* and *C.*  
190 *gattii* species complexes was also detected, with contigs matching to *C. gattii* VGI WM 276,  
191 *C. neoformans* var. *grubii* VNI H99 and *C. neoformans* var. *neoformans* VNIV strains B-  
192 3501A and JEC21 (Figure 2, Supplementary table S3). A proportion of the transcripts (1.6%)  
193 matched with equal probability scores to both strains of *C. neoformans* var. *neoformans* (B-  
194 3501A and JEC21, Supplementary tables S2 and S3). From the transcripts classified as  
195 *Cryptococcus* spp., 99.3% were classified as one of the four *Cryptococcus* strains (or both  
196 B-3501A and JEC21) used in the mock community. It is possible that misclassifications  
197 occurred within the strains analyzed. For example, transcripts originally from JEC21 might  
198 have been classified as B-3501A and *vice versa*. As it is not possible to know from which  
199 strain the transcripts originated, these possible misclassifications would be undetected.

200

201

## 202 Discussion

203 Our metatranscriptomics approach yielded taxonomic identification of fungi from a defined  
204 mock community with high success, while false-positives were detected at far lower  
205 abundance. These results indicate that it is possible to obtain accurate species- and strain-  
206 level identifications for fungi from metatranscriptome data, as long as taxa identified at low  
207 abundance are removed from the analyses to avoid false-positives derived from  
208 contamination or misclassifications.

209 Taxonomic classification at species and strain levels using metabarcoding and  
210 metagenomic data has been considered inaccurate (Nilsson *et al.* 2019; Sczyrba *et al.*  
211 2017; Yamamoto *et al.* 2014), raising the question of how our metatranscriptomics  
212 approach succeeded in identifying closely-related fungal strains. Metabarcoding relies on a  
213 single marker gene (Banchi *et al.* 2018; e.g. McGuire *et al.* 2013; Schmidt *et al.* 2013), which  
214 does not contain sufficient phylogenetic information to differentiate some closely related  
215 fungal lineages (Balasundaram *et al.* 2015; Nilsson *et al.* 2008). Metatranscriptomics, on the



216 other hand, yields data on all expressed coding sequences. Classifications derived from  
217 metagenomes are likely to be equally accurate as the ones obtained from  
218 metatranscriptomes, except that dead organisms might also be sequenced. Additionally,  
219 we used a new alignment method that is both highly accurate and fast (Clausen *et al.* 2018),  
220 allowing us to map sequences against the complete NCBI nucleotide collection. Complete  
221 genomes of all fungal isolates used here are available in NCBI, and it is likely that the  
222 accuracy of identifications is reduced for poorly-documented microorganisms. However, it  
223 is possible to extract informative genes from metatranscriptome data and subsequently  
224 perform phylogenomic analyses to identify rare and novel taxa (e.g. Shi *et al.* 2017; Wille *et al.*  
225 *al.* 2018; Zhang *et al.* 2018). Besides being highly accurate, metatranscriptomics is less  
226 susceptible to amplification bias, no information about the community members is required  
227 *a priori*, and it only detects functionally active members of a microbial community. These  
228 advantages make metatranscriptomics a promising tool in biodiversity surveys, functional  
229 assessments of microbial communities, pathogen detection and biosecurity surveillance  
230 (e.g. Kuske *et al.* 2015; Shi *et al.* 2016; Wille *et al.* 2018).

231 Even though false-positives were present at low abundance, they pose a challenge  
232 in the interpretation of metatranscriptomic and metagenomic data. False-positives generally  
233 result from spurious classifications and laboratory contaminants, which may be common in  
234 laboratory reagents (Salter *et al.* 2014). However, metatranscriptomics is less sensitive to  
235 laboratory contamination than DNA-based metagenomics or metabarcoding, as only living  
236 microorganisms are sequenced. Nevertheless, contamination can occur at all stages of the  
237 library preparation and is routinely observed in RNA-Seq studies (Quince *et al.* 2017; Strong  
238 *et al.* 2014). Misclassifications occur because some genome regions are very similar (or  
239 identical) across closely-related species and cannot be differentiated. Errors in reference  
240 databases can also result in misclassifications. Sequences attributed to incorrectly-  
241 classified species are not uncommon in GenBank and result in downstream classification  
242 errors (Li *et al.* 2018). It is also not unusual to find bacterial regions misassembled into  
243 eukaryotic genomes (e.g. Koutsovoulos *et al.* 2016), which can result in sequences from  
244 common laboratory contaminants being classified as a eukaryote. Filtering out organisms  
245 found in low abundance is an option to reduce the incidence of false-positives in  
246 downstream analyses. In this study, filtering organisms for which the abundance of  
247 transcripts is lower than 0.1% would eliminate false-positives, at the cost of excluding one  
248 true-positive from the analyses (Table 2). The application of this abundance-filtering step  
249 might not be feasible when sequencing depth (per microbial species) is limited. Species



250 present in low abundances will be represented by a small number of transcripts and so are  
251 more likely to be misclassified or undetected.

252 The abundance of transcripts and sequence reads can vary according to genome  
253 size, number of coding sequences and gene expression. Therefore, the abundance  
254 disparity across species observed here is unsurprising. Interestingly, we found no  
255 correlation between the abundance of transcripts and genome size or number of genes  
256 (Supplementary figure 1). Imprecise estimates of cell abundance and RNA extraction biases  
257 could also have influenced abundance estimates, and might be the reason why two species  
258 in the mock community (*D. hansenii* and *S. pombe*) were not detected in the analyses.  
259 Metabarcoding studies have suggested that performing DNA extraction in triplicate  
260 minimizes biases for bacteria, but it had no effect in fungal communities (Feinstein *et al.*  
261 2009). To our knowledge, the effect of RNA extraction bias in metatranscriptomics has yet  
262 to be studied. As metagenomics surveys are not affected by gene expression, they might  
263 be more appropriate for studies where it is important to quantify species abundance.

264 Although fungal species and their genes can be confidently identified, it remains  
265 challenging to link some genes with particular species using metatranscriptomics. A large  
266 portion of fungal genomes are highly similar among species, making it difficult, if not  
267 impossible, to infer which species in the community are expressing which genes. Recently,  
268 a method was developed to perform species-level functional profiling of metagenome data  
269 (Franzosa *et al.* 2018). This method, however, relies on a reference database of complete  
270 genomes that currently contains few fungal representatives, limiting its application in fungal  
271 metagenomics. Contrary to metatranscriptomics, metagenomics yields coding and non-  
272 coding sequences, which can facilitate linking genes to species if sequencing depth is large  
273 enough to assemble large parts of fungal genomes (e.g. Olm *et al.* 2019).

274 In sum, we show that metatranscriptomics is a useful approach to identify fungal  
275 species and subspecies in mixed samples. The major advantages of metatranscriptomics  
276 over other HTS technologies include the selective sequencing of living organisms and the  
277 ability to detect a wide range of microorganisms in one step, which has multiple  
278 applications in biological research, surveillance and diagnosis. There is an increasing  
279 literature reporting that virulence and antimicrobial tolerance traits vary within species  
280 (Firacative *et al.* 2016; Rizzetto *et al.* 2013; Schauwvlieghe *et al.* 2017; Strobe *et al.* 2015)  
281 and that multiple strains or species can co-infect a host (Desnos-Ollivier *et al.* 2010; Gupta  
282 *et al.* 2014; Seki *et al.* 2014; Soll *et al.* 1988; Tati *et al.* 2016). The high discriminatory power  
283 obtained for closely-related lineages of *Cryptococcus* provides a good example of where  
284 metatranscriptomics would be valuable in precision medicine, where therapy practices are

285 defined according to strain-specific pathogenicity and drug susceptibility traits. However, it  
286 must be acknowledged that metatranscriptomics also has limitations that are common to  
287 high-throughput sequencing methods, as it is susceptible to DNA/RNA extraction biases,  
288 contamination and misclassifications. These limitations can be significantly minimized if  
289 appropriate controls are in place (e.g. abundance filtering before statistical analyses).  
290 Besides its application to identify well-known fungal species, metatranscriptomics can help  
291 to identify novel functional roles of fungi (e.g. Gonzalez *et al.* 2018; Liao *et al.* 2014) and  
292 novel species when used within a phylogenomic framework.

293

294

## 295 **Acknowledgments**

296 We thank Fabio Santos and Krystyna Maszewska for helping with the fungal cultures and  
297 cell abundance estimates, and the High Performance Computing support at Sydney  
298 University. TCS and VRM are Sydney Medical Foundation Fellows whose work is supported  
299 by the Sydney Medical School Foundation. This work was funded in part by an NHMRC  
300 Centre of Research Excellence Grant (APP1102962) to TCS and an NHMRC grant  
301 (APP1121936) to WM and TC. ECH is funded by an ARC Australian Laureate Fellowship  
302 (FL170100022).

303

304

## 305 **References**

- 306 Balasundaram SV, Engh IB, Skrede I, Kauserud H (2015) How many DNA markers are  
307 needed to reveal cryptic fungal species? *Fungal Biol* **119**: 940-945.
- 308 Banchi E, Ametrano CG, Stankovic D, *et al.* (2018) DNA metabarcoding uncovers fungal  
309 diversity of mixed airborne samples in Italy. *PLoS One* **13**: e0194489.
- 310 Bandara H, Panduwawala CP, Samaranayake LP (2019) Biodiversity of the human oral  
311 mycobiome in health and disease. *Oral Dis* **25**: 363-371.
- 312 Bashiardes S, Zilberman-Schapira G, Elinav E (2016) Use of Metatranscriptomics in  
313 Microbiome Research. *Bioinform Biol Insights* **10**: 19-25.
- 314 Brown GD, Denning DW, Gow NA, *et al.* (2012) Hidden killers: human fungal infections. *Sci*  
315 *Transl Med* **4**: 165rv113.
- 316 Carini P, Marsden PJ, Leff JW, *et al.* (2016) Relic DNA is abundant in soil and obscures  
317 estimates of soil microbial diversity. *Nat Microbiol* **2**: 16242.

- 318 Clausen P, Aarestrup FM, Lund O (2018) Rapid and precise alignment of raw reads against  
319 redundant databases with KMA. *BMC Bioinformatics* **19**: 307.
- 320 Desnos-Ollivier M, Patel S, Raoux-Barbot D, *et al.* (2015) Cryptococcosis Serotypes Impact  
321 Outcome and Provide Evidence of *Cryptococcus neoformans* Speciation. *MBio* **6**:  
322 e00311.
- 323 Desnos-Ollivier M, Patel S, Spaulding AR, *et al.* (2010) Mixed infections and *In Vivo*  
324 evolution in the human fungal pathogen *Cryptococcus neoformans*. *MBio* **1**.
- 325 Dujon B (2010) Yeast evolutionary genomics. *Nature Reviews: Genetics* **11**: 512-524.
- 326 Enaud R, Vandenberght LE, Coron N, *et al.* (2018) The Mycobiome: A Neglected  
327 Component in the Microbiota-Gut-Brain Axis. *Microorganisms* **6**.
- 328 Federhen S (2012) The NCBI Taxonomy database. *Nucleic Acids Research* **40**: D136-143.
- 329 Feinstein LM, Sul WJ, Blackwood CB (2009) Assessment of bias associated with incomplete  
330 extraction of microbial DNA from soil. *Applied and Environmental Microbiology* **75**:  
331 5428-5433.
- 332 Firacative C, Roe CC, Malik R, *et al.* (2016) MLST and Whole-Genome-Based Population  
333 Analysis of *Cryptococcus gattii* VGIII Links Clinical, Veterinary and Environmental  
334 Strains, and Reveals Divergent Serotype Specific Sub-populations and Distant  
335 Ancestors. *PLoS Negl Trop Dis* **10**: e0004861.
- 336 Franzosa EA, Mclver LJ, Rahnavard G, *et al.* (2018) Species-level functional profiling of  
337 metagenomes and metatranscriptomes. *Nature Methods* **15**: 962-968.
- 338 Gonzalez E, Pitre FE, Page AP, *et al.* (2018) Trees, fungi and bacteria: tripartite  
339 metatranscriptomics of a root microbiome responding to soil contamination.  
340 *Microbiome* **6**: 53.
- 341 Grabherr MG, Haas BJ, Yassour M, *et al.* (2011) Full-length transcriptome assembly from  
342 RNA-Seq data without a reference genome. *Nature Biotechnology* **29**: 644-652.
- 343 Gupta V, Rajagopalan N, Patil M, Shivaprasad C (2014) *Aspergillus* and mucormycosis  
344 presenting with normal chest X-ray in an immunocompromised host. *BMJ Case Rep*  
345 **2014**.
- 346 Hagen F, Khayhan K, Theelen B, *et al.* (2015) Recognition of seven species in the  
347 *Cryptococcus gattii*/*Cryptococcus neoformans* species complex. *Fungal Genetics*  
348 *and Biology* **78**: 16-48.
- 349 Hannula SE, Morrien E, de Hollander M, *et al.* (2017) Shifts in rhizosphere fungal community  
350 during secondary succession following abandonment from agriculture. *ISME Journal*  
351 **11**: 2294-2304.

- 352 Hawksworth DL, Lucking R (2017) Fungal Diversity Revisited: 2.2 to 3.8 Million Species.  
353 *Microbiol Spectr* **5**.
- 354 Huffnagle GB, Noverr MC (2013) The emerging world of the fungal microbiome. *Trends in*  
355 *Microbiology* **21**: 334-341.
- 356 Kassambara A (2017) ggpubr:“ggplot2” based publication ready plots. R package version  
357 0.1. 6.
- 358 Koutsovoulos G, Kumar S, Laetsch DR, *et al.* (2016) No evidence for extensive horizontal  
359 gene transfer in the genome of the tardigrade *Hypsibius dujardini*. *Proc Natl Acad Sci*  
360 *U S A* **113**: 5053-5058.
- 361 Kullman B, Tamm H, Kullman K (2005) *Fungal Genome Size Database*.  
362 <http://www.zbi.ee/fungal-genomesize/>
- 363 Kuske CR, Hesse CN, Challacombe JF, *et al.* (2015) Prospects and challenges for fungal  
364 metatranscriptomics of complex communities. *Fungal Ecology* **14**: 133-137.
- 365 Kwon-Chung KJ, Bennett JE, Wickes BL, *et al.* (2017) The Case for Adopting the "Species  
366 Complex" Nomenclature for the Etiologic Agents of Cryptococcosis. *mSphere* **2**.
- 367 Kwon-Chung KJ, Boekhout T, Fell JW, Diaz M (2002) Proposal to conserve the name  
368 *Cryptococcus gattii* against *C. hondurianus* and *C. bacillisporus* (Basidiomycota,  
369 Hymenomycetes, Tremellomycetidae). *Taxon* **51**: 804-806.
- 370 Langmead B, Salzberg SL (2012) Fast gapped-read alignment with Bowtie 2. *Nature*  
371 *Methods* **9**: 357-359.
- 372 Li B, Dewey CN (2011) RSEM: accurate transcript quantification from RNA-Seq data with or  
373 without a reference genome. *BMC Bioinformatics* **12**: 323.
- 374 Li X, Shen X, Chen X, *et al.* (2018) Detection of Potential Problematic Cytb Gene  
375 Sequences of Fishes in GenBank. *Front Genet* **9**: 30.
- 376 Liao HL, Chen Y, Bruns TD, *et al.* (2014) Metatranscriptomic analysis of ectomycorrhizal  
377 roots reveals genes associated with *Piloderma-Pinus* symbiosis: improved  
378 methodologies for assessing gene expression in situ. *Environmental Microbiology* **16**:  
379 3730-3742.
- 380 Loftus BJ, Fung E, Roncaglia P, *et al.* (2005) The genome of the basidiomycetous yeast and  
381 human pathogen *Cryptococcus neoformans*. *Science* **307**: 1321-1324.
- 382 Marcelino VR, Verbruggen H (2016) Multi-marker metabarcoding of coral skeletons reveals  
383 a rich microbiome and diverse evolutionary origins of endolithic algae. *Scientific*  
384 *Reports* **6**: 31508.
- 385 McGuire KL, Payne SG, Palmer MI, *et al.* (2013) Digging the New York City Skyline: soil  
386 fungal communities in green roofs and city parks. *PLoS One* **8**: e58020.

- 387 Munoz JF, Gade L, Chow NA, *et al.* (2018) Genomic insights into multidrug-resistance,  
388 mating and virulence in *Candida auris* and related emerging species. *Nature*  
389 *Communications* **9**: 5346.
- 390 Ngamskulrungrroj P, Gilgado F, Faganello J, *et al.* (2009) Genetic diversity of the  
391 *Cryptococcus* species complex suggests that *Cryptococcus gattii* deserves to have  
392 varieties. *PLoS One* **4**: e5862.
- 393 Nilsson RH, Anslan S, Bahram M, *et al.* (2019) Mycobiome diversity: high-throughput  
394 sequencing and identification of fungi. *Nature Reviews: Microbiology* **17**: 95-109.
- 395 Nilsson RH, Kristiansson E, Ryberg M, Hallenberg N, Larsson K-H (2008) Intraspecific ITS  
396 Variability in the Kingdom Fungi as Expressed in the International Sequence  
397 Databases and Its Implications for Molecular Species Identification. *Evolutionary*  
398 *Bioinformatics* **4**.
- 399 Olm MR, West PT, Brooks B, *et al.* (2019) Genome-resolved metagenomics of eukaryotic  
400 populations during early colonization of premature infants and in hospital rooms.  
401 *Microbiome* **7**: 26.
- 402 Quince C, Walker AW, Simpson JT, Loman NJ, Segata N (2017) Shotgun metagenomics,  
403 from sampling to analysis. *Nature Biotechnology* **35**: 833-844.
- 404 Rizzetto L, Giovannini G, Bromley M, *et al.* (2013) Strain dependent variation of immune  
405 responses to *A. fumigatus*: definition of pathogenic species. *PLoS One* **8**: e56651.
- 406 Salter SJ, Cox MJ, Turek EM, *et al.* (2014) Reagent and laboratory contamination can  
407 critically impact sequence-based microbiome analyses. *BMC Biology* **12**: 87.
- 408 Schauwvlieghe A, Vonk AG, Buddingh EP, *et al.* (2017) Detection of azole-susceptible and  
409 azole-resistant *Aspergillus* coinfection by cyp51A PCR amplicon melting curve  
410 analysis. *Journal of Antimicrobial Chemotherapy* **72**: 3047-3050.
- 411 Schmidt P-A, Bálint M, Greshake B, *et al.* (2013) Illumina metabarcoding of a soil fungal  
412 community. *Soil Biology and Biochemistry* **65**: 128-132.
- 413 Schmieder R, Edwards R (2011) Quality control and preprocessing of metagenomic  
414 datasets. *Bioinformatics* **27**: 863-864.
- 415 Sczyrba A, Hofmann P, Belmann P, *et al.* (2017) Critical Assessment of Metagenome  
416 Interpretation-a benchmark of metagenomics software. *Nature Methods* **14**: 1063-  
417 1071.
- 418 Seed PC (2014) The human mycobiome. *Cold Spring Harb Perspect Med* **5**: a019810.
- 419 Seki M, Ohno H, Gotoh K, *et al.* (2014) Allergic bronchopulmonary mycosis due to co-  
420 infection with *Aspergillus fumigatus* and *Schizophyllum commune*. *IDCases* **1**: 5-8.

- 421 Shakya M, Quince C, Campbell JH, *et al.* (2013) Comparative metagenomic and rRNA  
422 microbial diversity characterization using archaeal and bacterial synthetic  
423 communities. *Environmental Microbiology* **15**: 1882-1899.
- 424 Shi M, Lin XD, Tian JH, *et al.* (2016) Redefining the invertebrate RNA virosphere. *Nature*.  
425 Shi M, Neville P, Nicholson J, *et al.* (2017) High-Resolution Metatranscriptomics Reveals the  
426 Ecological Dynamics of Mosquito-Associated RNA Viruses in Western Australia.  
427 *Journal of Virology* **91**.
- 428 Soll DR, Staebell M, Langtimm C, *et al.* (1988) Multiple *Candida* strains in the course of a  
429 single systemic infection. *Journal of Clinical Microbiology* **26**: 1448-1459.
- 430 Strong MJ, Xu G, Morici L, *et al.* (2014) Microbial contamination in next generation  
431 sequencing: implications for sequence-based analysis of clinical samples. *PLoS*  
432 *Pathog* **10**: e1004437.
- 433 Strobe PK, Skelly DA, Kozmin SG, *et al.* (2015) The 100-genomes strains, an *S. cerevisiae*  
434 resource that illuminates its natural phenotypic and genotypic variation and  
435 emergence as an opportunistic pathogen. *Genome Research* **25**: 762-774.
- 436 Tati S, Davidow P, McCall A, *et al.* (2016) *Candida glabrata* Binding to *Candida albicans*  
437 Hyphae Enables Its Development in Oropharyngeal Candidiasis. *PLoS Pathog* **12**:  
438 e1005522.
- 439 Tedersoo L, Anslan S, Bahram M, *et al.* (2015) Shotgun metagenomes and multiple primer  
440 pair-barcode combinations of amplicons reveal biases in metabarcoding analyses of  
441 fungi. *MycoKeys* **10**: 1-43.
- 442 Wille M, Eden JS, Shi M, *et al.* (2018) Virus-virus interactions and host ecology are  
443 associated with RNA virome structure in wild birds. *Molecular Ecology* **27**: 5263-  
444 5278.
- 445 Yahr R, Schoch CL, Dentinger BT (2016) Scaling up discovery of hidden diversity in fungi:  
446 impacts of barcoding approaches. *Philos Trans R Soc Lond B Biol Sci* **371**.
- 447 Yamamoto N, Dannemiller KC, Bibby K, Peccia J (2014) Identification accuracy and diversity  
448 reproducibility associated with internal transcribed spacer-based fungal taxonomic  
449 library preparation. *Environmental Microbiology* **16**: 2764-2776.
- 450 Zhang YZ, Shi M, Holmes EC (2018) Using Metagenomics to Characterize an Expanding  
451 Virosphere. *Cell* **172**: 1168-1172.

452  
453  
454  
455



456 **Tables:**

457

458 **Table 1.** Species and strains used to construct a mock fungal community for

459 metatranscriptome sequencing.

| <b>Fungal species</b>                                            | <b>Strain number</b> |
|------------------------------------------------------------------|----------------------|
| <i>Candida albicans</i>                                          | WM 229               |
| <i>Candida auris</i>                                             | WM 17.110            |
| <i>Candida glabrata</i>                                          | WM 13.101            |
| <i>Candida dubliniensis</i>                                      | WM 606               |
| <i>Candida orthopsilosis</i>                                     | WM 03.136            |
| <i>Candida tropicalis</i>                                        | WM 17.08             |
| <i>Clavispora lusitaniae</i> (former <i>Candida lusitaniae</i> ) | WM 14.04             |
| <i>Cryptococcus gattii</i> (VGI)                                 | WM 276               |
| <i>Cryptococcus neoformans</i> var. <i>grubii</i> (VNI)          | H99 GC (H99)         |
| <i>Cryptococcus neoformans</i> var. <i>neoformans</i> (VNIV)     | WM 01.133 (B-3501A)  |
| <i>Cryptococcus neoformans</i> var. <i>neoformans</i> (VNIV)     | WM 01.127 (JEC21)    |
| <i>Debaryomyces hansenii</i>                                     | WM 36                |
| <i>Pichia kudriavzevii</i> (former <i>Candida krusei</i> )       | WM 14                |
| <i>Pichia membranifaciens</i>                                    | WM 46                |
| <i>Saccharomyces cerevisiae</i>                                  | WM 318               |
| <i>Schizosaccharomyces pombe</i>                                 | WM 72                |
| <i>Yarrowia lipolytica</i>                                       | WM 63                |

460

461

462

463

464 **Table 2.** Abundance of reads (TPM) and abundance of transcripts (Depth) per fungal

465 species detected with metatranscriptomics. True members of the mock community – at

466 species level – are shown in bold.

| <b>Species*</b>                       | <b>TPM</b><br>(read-level) | <b>Depth</b><br>(transcript-level) | <b>Relative abundance</b><br>(transcript-level %) |
|---------------------------------------|----------------------------|------------------------------------|---------------------------------------------------|
| <b><i>Cryptococcus neoformans</i></b> | <b>149692.28</b>           | <b>11049.04</b>                    | <b>22.464</b>                                     |
| <b><i>Candida tropicalis</i></b>      | <b>142496.47</b>           | <b>9424.30</b>                     | <b>19.161</b>                                     |
| <b><i>Pichia kudriavzevii</i></b>     | <b>62133.74</b>            | <b>9234.05</b>                     | <b>18.774</b>                                     |
| <b><i>Clavispora lusitaniae</i></b>   | <b>57317.81</b>            | <b>7107.80</b>                     | <b>14.451</b>                                     |
| <b><i>Candida auris</i></b>           | <b>13402.41</b>            | <b>3354.39</b>                     | <b>6.820</b>                                      |
| <b><i>Candida dubliniensis</i></b>    | <b>52027.94</b>            | <b>1706.41</b>                     | <b>3.469</b>                                      |
| <b><i>Pichia membranifaciens</i></b>  | <b>10860.75</b>            | <b>1498.26</b>                     | <b>3.046</b>                                      |
| <b><i>Candida albicans</i></b>        | <b>42948.69</b>            | <b>1441.56</b>                     | <b>2.931</b>                                      |
| <b><i>Yarrowia lipolytica</i></b>     | <b>52376.03</b>            | <b>1384.29</b>                     | <b>2.814</b>                                      |

|                                                    |                 |                |              |
|----------------------------------------------------|-----------------|----------------|--------------|
| <b><i>Candida orthopsilosis</i></b>                | <b>44531.25</b> | <b>1308.09</b> | <b>2.660</b> |
| <b><i>Candida glabrata</i></b>                     | <b>50404.11</b> | <b>992.55</b>  | <b>2.018</b> |
| <b><i>Cryptococcus gattii</i> VGI</b>              | <b>9350.81</b>  | <b>463.71</b>  | <b>0.943</b> |
| <i>Candida glycerinogenes</i>                      | 2345.13         | 41.51          | 0.084        |
| <i>Nakaseomyces delphensis</i>                     | 12821.76        | 35.45          | 0.072        |
| <i>Candida parapsilosis</i>                        | 15989.78        | 31.11          | 0.063        |
| <i>Candida nivariensis</i>                         | 1411.36         | 12.72          | 0.026        |
| <i>Kluyveromyces marxianus</i>                     | 47.70           | 8.90           | 0.018        |
| <i>Torulaspora delbrueckii</i>                     | 15.01           | 6.00           | 0.012        |
| <i>Kluyveromyces lactis</i>                        | 9.24            | 3.93           | 0.008        |
| <b><i>Saccharomyces cerevisiae</i></b>             | <b>22.84</b>    | <b>3.77</b>    | <b>0.008</b> |
| <i>Eremothecium sincaudum</i>                      | 25.93           | 3.67           | 0.008        |
| <i>Pichia cecembensis</i>                          | 751.23          | 3.60           | 0.007        |
| <i>Lodderomyces elongisporus</i>                   | 34.30           | 3.59           | 0.007        |
| Uncultured <i>Candida</i>                          | 885.35          | 3.13           | 0.006        |
| <i>Eremothecium gossypii</i>                       | 10.13           | 3.04           | 0.006        |
| <i>Naumovozya dairenensis</i>                      | 17.37           | 2.80           | 0.006        |
| <i>Suhomyces tanzawaensis</i>                      | 30.87           | 2.25           | 0.005        |
| Dipodascaceae sp. LM136                            | 24286.11        | 2.16           | 0.004        |
| <i>Cyberlindnera jadinii</i>                       | 12.32           | 2.04           | 0.004        |
| <i>Metschnikowia bicuspidata</i>                   | 16.02           | 1.29           | 0.003        |
| <i>Brettanomyces naardenensis</i>                  | 96.13           | 1.19           | 0.002        |
| <i>Pichia norvegensis</i>                          | 783.06          | 1.11           | 0.002        |
| <i>Debaryomyces fabryi</i>                         | 22.87           | 0.92           | 0.002        |
| <i>Candida neerlandica</i>                         | 487.65          | 0.69           | 0.001        |
| <i>Melanotaenium endogenum</i>                     | 262.12          | 0.59           | 0.001        |
| <i>Pichia kluyveri</i>                             | 51814.00        | 0.55           | 0.001        |
| <i>Candida pseudohaemulonis</i>                    | 560.14          | 0.49           | 0.001        |
| <i>Candida</i> sp. (in: <i>Saccharomycetales</i> ) | 330.15          | 0.49           | 0.001        |
| <i>Pichia</i> sp. 2 TMS-2011                       | 0.00            | 0.45           | 0.001        |
| <i>Cryptococcus neoformans</i> AD hybrid           | 0.00            | 0.44           | 0.001        |
| <i>Saccharomycetales</i> sp. LM594                 | 2.60            | 0.30           | 0.001        |
| <i>Naumovozya castellii</i>                        | 4.56            | 0.29           | 0.001        |
| <i>Saccharomyces pastorianus</i>                   | 0.81            | 0.26           | 0.001        |
| <i>Cryptococcus gattii</i> VGIII                   | 0.48            | 0.21           | 0.000        |
| Other Eukaryotes                                   | 936.75          | 18.83          | 0.038        |
| Bacteria                                           | 423.36          | 15.79          | 0.032        |
| Unclassified                                       | 198000.57       | 8.00           | 0.016        |
| <b>TOTAL</b>                                       | <b>1000000</b>  | <b>49186</b>   | <b>100</b>   |

467 \* Species defined according to the NCBI taxonomy database. Strain numbers may indicate vouchers  
 468 rather than genetically different lineages.

469

470

471 **Figures**

472

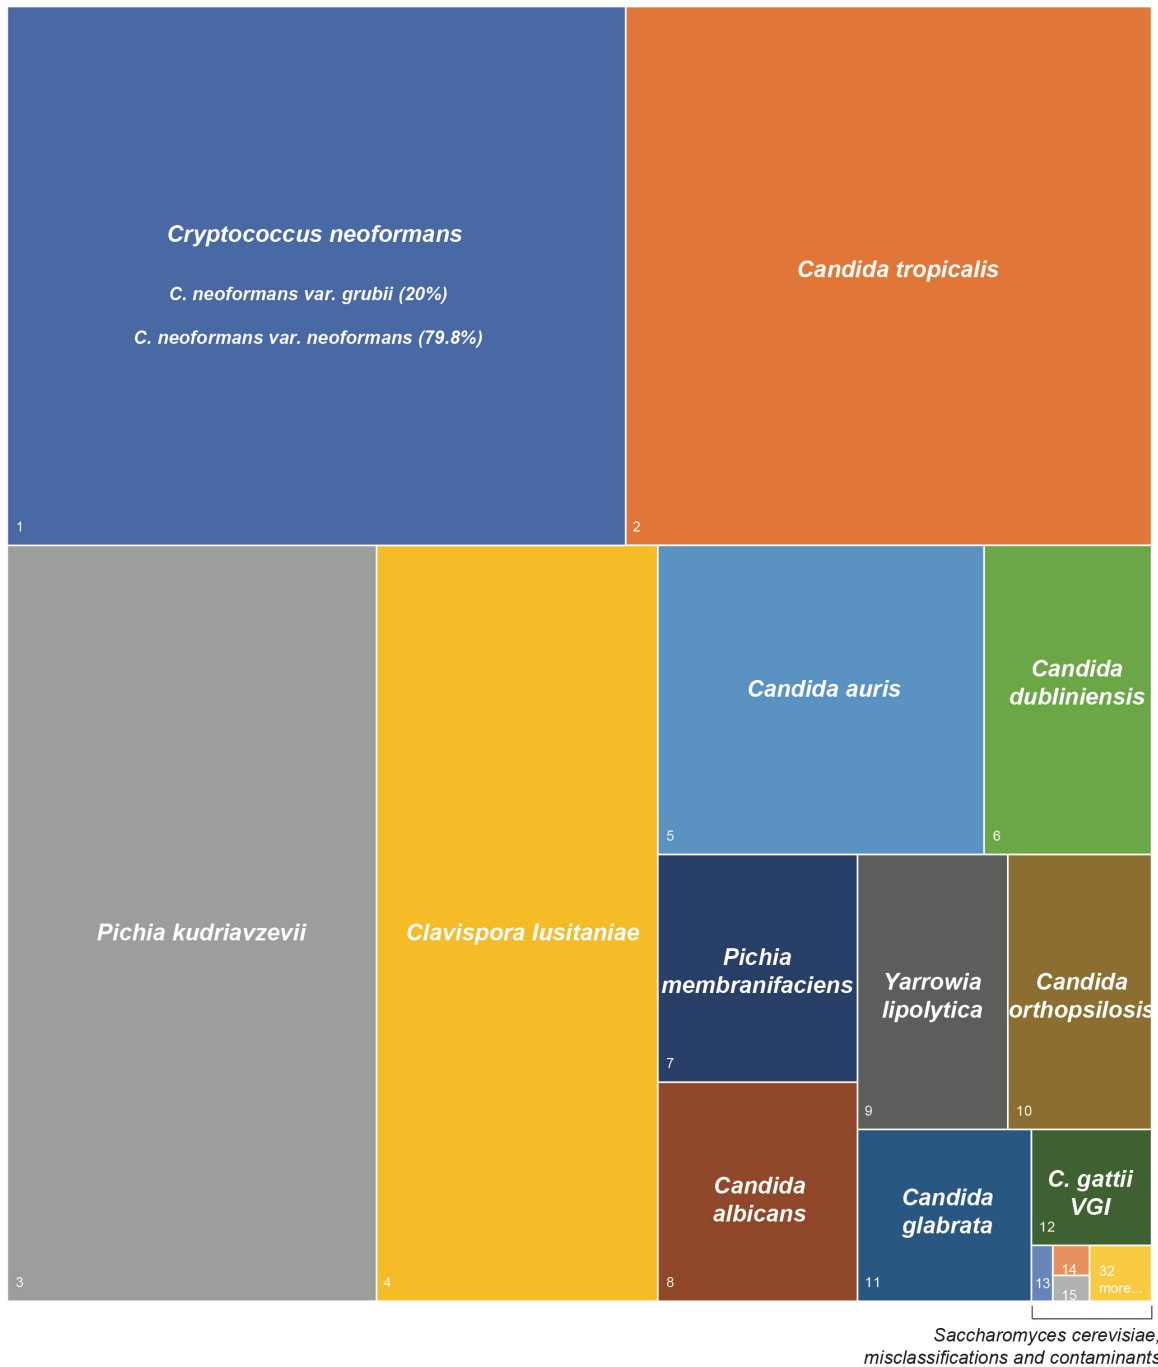

473

474 **Figure 1.** Relative abundance of transcripts assigned to microbial species recovered in the

475 metatranscriptome of a mock community. See Table 2 for a full list of species and more

476 details about their abundance.

477

478  
479  
480  
481  
482  
483  
484  
485  
486  
487  
488  
489  
490  
491  
492  
493  
494  
495  
496  
497  
498  
499  
500  
501  
502  
503

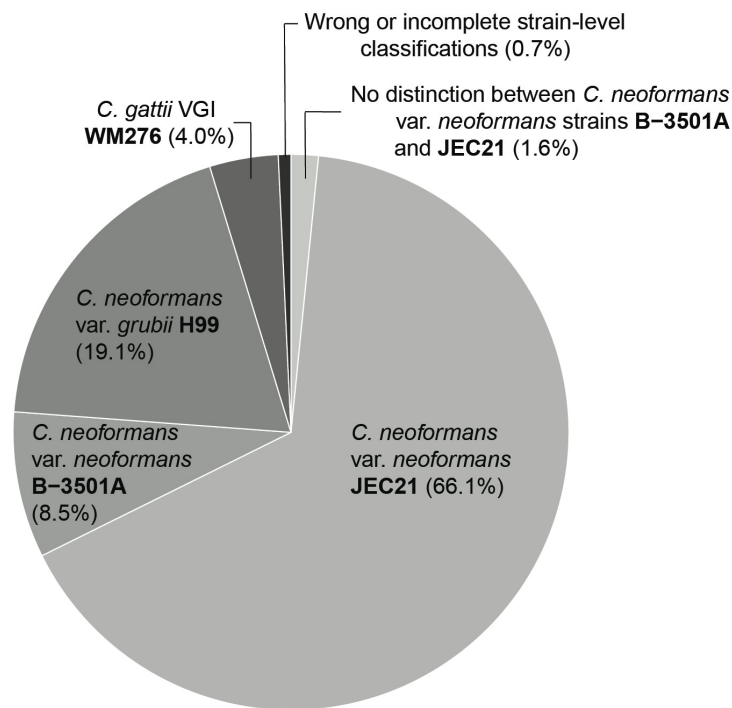

**Figure 2.** Strain-level classifications of taxa within the *Cryptococcus neoformans* and *C. gattii* species complexes.
